# Supplementary material
Source: publisher figshare collection journal article supplement (https://sage.figshare.com/ndownloader/files/17360441)

## Appendix

**Table A1.** Summary Statistics

| Variable                  | Mean  | Std. Dev. | Min | Max |
|---------------------------|-------|-----------|-----|-----|
| Education Level           | 2.71  | 1.40      | 0   | 7   |
| Age (18-70)               | 37.69 | 14.06     | 18  | 70  |
| Female (0-1)              | 0.50  | 0.50      | 0   | 1   |
| Socioeconomic Level (1-5) | 3.22  | 1.03      | 1   | 5   |

**Table A2.** Balance Tests

| Variable            | Combined<br>N=1308 | Corrupt<br>N=652 | Honest<br>N=656 | P-value |
|---------------------|--------------------|------------------|-----------------|---------|
| Age (18-65)         | 37.69              | 38.06            | 37.32           | 0.34    |
| Female (0-1)        | 0.5                | 0.5              | 0.5             | 0.87    |
| Education (0-7)     | 2.71               | 2.69             | 2.72            | 0.74    |
| Socioeconomic (1-5) | 3.22               | 3.23             | 3.21            | 0.83    |

**Table A3.** Corruption Effect on Likelihood of Electoral Support

| DV: Support<br>(1-7) | Model<br>(1)         | Model<br>(2)         | Model<br>(3)         | Model<br>(4)         | Model<br>(5)         | Model<br>(6)         |
|----------------------|----------------------|----------------------|----------------------|----------------------|----------------------|----------------------|
| Corruption           | -1.186***<br>(0.104) | -1.417***<br>(0.181) | -1.410***<br>(0.180) | -1.410***<br>(0.161) | -1.405***<br>(0.178) | -1.410***<br>(0.179) |
| Competence           | 0.614***<br>(0.104)  | 0.426**<br>(0.148)   | 0.428**<br>(0.147)   | 0.428**<br>(0.187)   | 0.419**<br>(0.146)   | 0.428**<br>(0.146)   |
| Prevalence           | -0.234**<br>(0.104)  | -0.276*<br>(0.148)   | -0.282*<br>(0.147)   | -0.282**<br>(0.136)  | -0.287**<br>(0.146)  | -0.282*<br>(0.146)   |
| Corruption*          |                      |                      |                      |                      |                      |                      |
| Competence           |                      | 0.375*<br>(0.208)    | 0.394*<br>(0.207)    | 0.394*<br>(0.229)    | 0.431**<br>(0.206)   | 0.394*<br>(0.206)    |
| Corruption *         |                      |                      |                      |                      |                      |                      |
| Prevalence           |                      | 0.0868<br>(0.208)    | 0.0856<br>(0.208)    | 0.0860<br>(0.176)    | 0.0843<br>(0.206)    | 0.0856<br>(0.207)    |
| Constant             | 3.797***<br>(0.104)  | 3.912***<br>(0.128)  | 4.115***<br>(0.396)  | 4.115***<br>(0.438)  | 4.186***<br>(0.398)  | 4.115***<br>(0.395)  |
| Controls             | No                   | No                   | Yes                  | Yes                  | Yes                  | Yes                  |
| N                    | 1270                 | 1270                 | 1270                 | 1270                 | 1270                 | 1270                 |

Notes: Standard errors in parentheses \*p < .10, \*\*p < .05, \*\*\* p < .01. Models 1-3 are standard linear regressions. Model 4 uses survey sampling weights and clustering. Model 5 is a multilevel regression with random effects specified at the district level. Model 6 is a multilevel mixed-effects generalized linear model for survey data. Controls in models 3-6 are gender, age, education, and socioeconomic level.

**Table A4.** Corruption Effect on Electoral Support (Ordered Logistic Models)

|                         | Model                | Model                | Model                | Model                |
|-------------------------|----------------------|----------------------|----------------------|----------------------|
| DV: Support (1-7)       | (1)                  | (2)                  | (3)                  | (4)                  |
| Corruption              | -1.164***<br>(0.103) | -1.391***<br>(0.175) | -1.411***<br>(0.175) | -1.411***<br>(0.158) |
| Competence              | 0.590***<br>(0.100)  | 0.398**<br>(0.139)   | 0.403**<br>(0.139)   | 0.403**<br>(0.169)   |
| Prevalence              | -0.244**<br>(0.099)  | -0.273**<br>(0.139)  | -0.284**<br>(0.139)  | -0.284**<br>(0.126)  |
| Corruption * Competence |                      | 0.397**<br>(0.199)   | 0.426**<br>(0.200)   | 0.426**<br>(0.209)   |
| Corruption * Prevalence |                      | 0.059<br>(0.199)     | 0.070<br>(0.200)     | 0.070<br>(0.179)     |
| Cut1                    | -1.545***<br>(0.112) | -1.655***<br>(0.131) | -2.019***<br>(0.384) | -2.019***<br>(0.427) |
| Cut2                    | -0.936***<br>(0.106) | -1.043***<br>(0.125) | -1.389***<br>(0.381) | -1.389**<br>(0.420)  |
| Cut3                    | -0.293**<br>(0.102)  | -0.398**<br>(0.122)  | -0.729*<br>(0.379)   | -0.728*<br>(0.431)   |
| Cut4                    | 0.494***             | 0.388**              | 0.0688               | 0.0692               |

|          |          |          |          |          |
|----------|----------|----------|----------|----------|
|          | (0.103)  | (0.122)  | (0.379)  | (0.434)  |
| Cut5     | 1.448*** | 1.339*** | 1.024**  | 1.025**  |
|          | (0.112)  | (0.130)  | (0.382)  | (0.435)  |
| Cut6     | 1.950*** | 1.840*** | 1.525*** | 1.525*** |
|          | (0.123)  | (0.140)  | (0.386)  | (0.434)  |
| Controls | No       | No       | Yes      | Yes      |
| N        | 1270     | 1270     | 1270     | 1270     |

---

Notes: Standard errors in parentheses \*p < .10, \*\*p < .05, \*\*\* p< .01. Models 1-4 correspond to ordered logistic models, using the 1-7 likelihood of support dependent variable, where 1 means less likely to vote for candidate, and 7 more likely to vote for candidate. Controls in models 3 and 4 are gender, age, education, and socioeconomic level.

**Table A5.** Predicted Values of Support for Competent and Incompetent Candidates,  
by Limited/Prevalent Condition

|                                 | Competent       | Incompetent     | Change<br>Comp. vs. Incomp. | P-value |
|---------------------------------|-----------------|-----------------|-----------------------------|---------|
| Support at Prevalent Corruption | 3.494<br>(0.13) | 3.067<br>(0.13) | - 0.427<br>(0.21)           | 0.045   |
| Support at Limited Corruption   | 3.717<br>(0.13) | 3.291<br>(0.13) | - 0.425<br>(0.21)           | 0.039   |

Notes: Standard errors in parentheses. Using Models 2 and 3 from Table 3.

Table A5 show that, in a high corruption environment, the predicted value of support for a competent candidate is 3.494, whereas it is 3.067 for an incompetent candidate. Therefore, the effect of competence on support is 0.427, and this effect is statistically significant. Similarly, the effect of competence on support is 0.425 in a setting of limited corruption.

**Figure A1.** Intra-National Variation of Perceptions of Corruption in Public Office in Peru

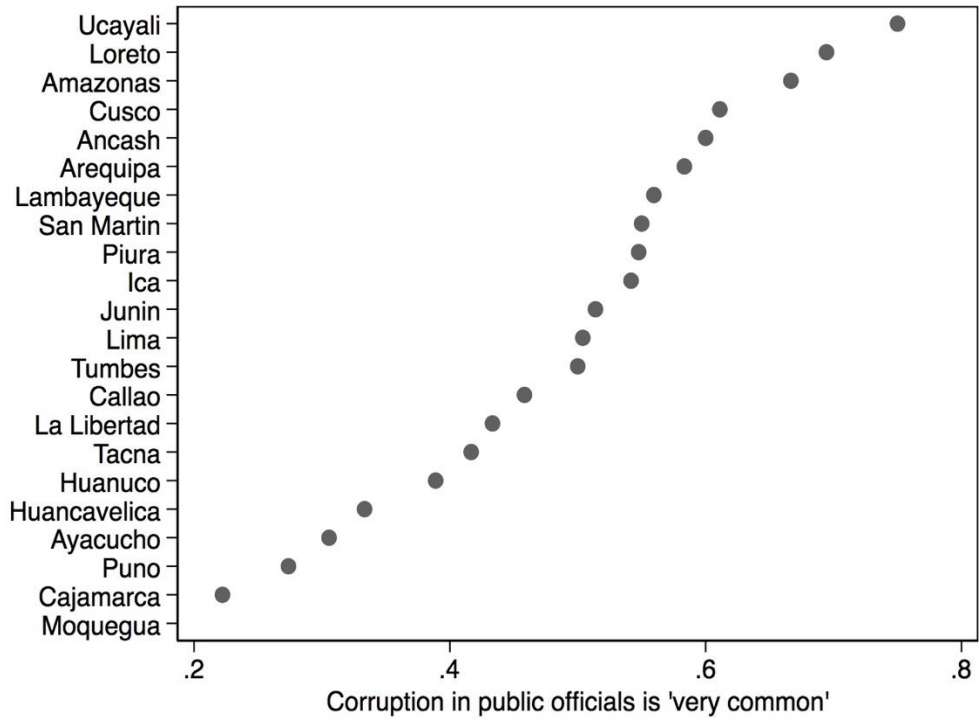

Source: 2014 AmericasBarometer

**Figure A2.** Distribution of Likelihood of Electoral Support by Experimental Groups

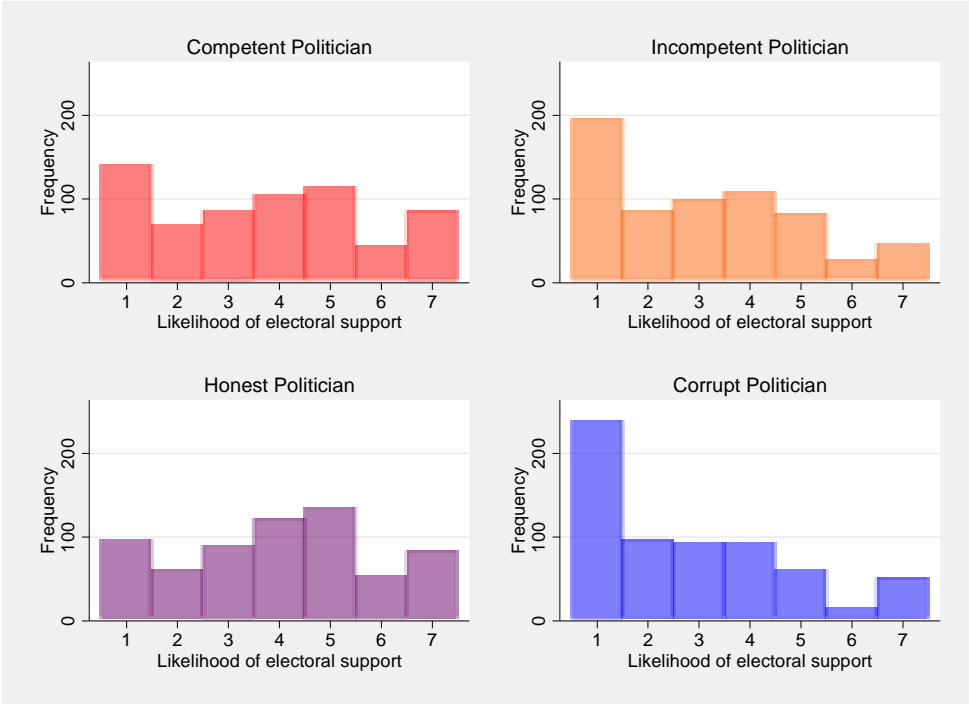

Supplement: Supplementary file 1 [file 17360441]
